# Supplementary material
Source: Springer Nature journal article supplement (https://www.springermedizin.de/resource/supplementary/13013_2010_324_MOESM6_ESM.pdf/9631630)

# Lumbar curve module

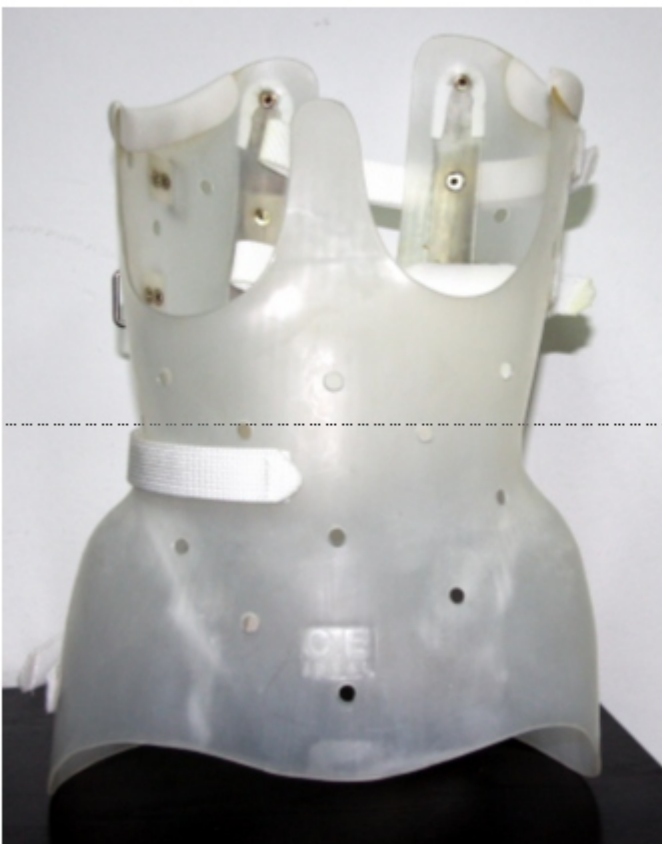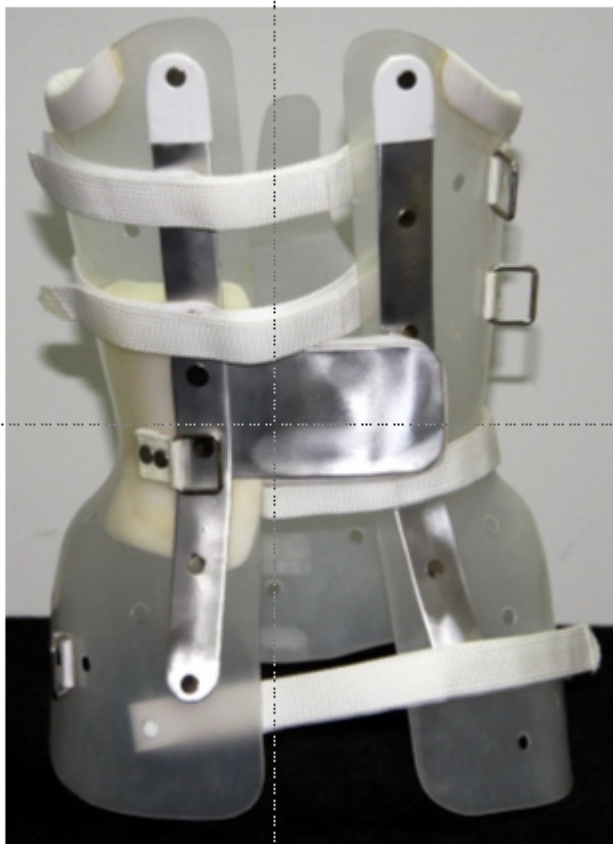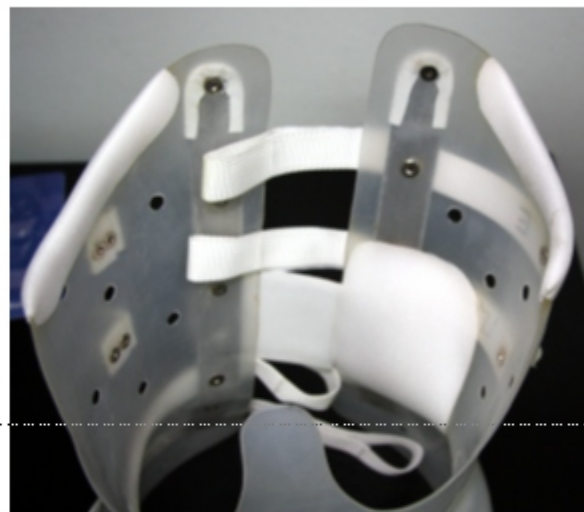

Supplement: MOESM6 [file 9631630]
